# Supplementary material for: Nutrient utilisation and weathering inputs in the Peruvian upwelling region since the Little Ice Age
Source: Copernicus journal article supplement (doi:10.5194/cp-11-187-2015), 2015-02-10
Supplement: Supplementary file 1 [file cp-11-187-2015-supplement.pdf]

Supplement of *Clim. Past*, 11, 187–202, 2015  
<http://www.clim-past.net/11/187/2015/>  
doi:10.5194/cp-11-187-2015-supplement  
© Author(s) 2015. CC Attribution 3.0 License.

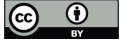

*Supplement of*

## **Nutrient utilisation and weathering inputs in the Peruvian upwelling region since the Little Ice Age**

**C. Ehlert et al.**

*Correspondence to:* C. Ehlert (cehlert@mpi-bremen.de)

## 1 **1 Age model for core M771-470**

2 Core M771-470 was taken at 11° S, 77°56.6' W in 145 m water depth during cruise  
3 M77/1 with the German R/V Meteor in 2008 (Fig. 1). The age model was obtained by  
4 measuring excess  $^{210}\text{Pb}$  activities and modeling the resulting profiles as described by  
5 Meysman et al. (2005) (Fig. S1, Table S1). Porosity data for core M771-470 were  
6 determined from water loss after freeze-drying. The fit to the porosity data was  
7 obtained by applying  $\Phi_0$  (porosity at the sediment water interface) = 0.95,  $\Phi_f$  (porosity  
8 at infinite depth after steady state compaction) = 0.85,  $p$  (attenuation constant) = 0.02  
9  $\text{cm}^{-1}$ . Excess  $^{210}\text{Pb}$  was modelled based on a fit to the data obtained with  $D_B(0)$   
10 (bioturbation coefficient at the sediment water interface) = 30  $\text{cm}^2 \text{yr}^{-1}$ ,  $x_s$  (sediment  
11 depth where  $D_B(x)$  is approaching a value of zero) = 7 cm,  $A_1$  ( $^{210}\text{Pb}$  activity of the  
12 particles raining to the seafloor) = 3.4  $\text{Bq g}^{-1}$ ,  $w_f$  (burial velocity) = 48  $\text{cm kyr}^{-1}$ . These  
13 results indicate bioturbation in the uppermost 10 cm. The average sedimentation rate  
14 of core M771-470 between 10 and 25cm profile depth of 0.92 mm/yr is essentially  
15 identical to the one obtained from the nearby core SO147-106KL for the time period  
16 1400-1900 AD of 0.9 mm/yr (Rein et al., 2004).

17 The porosity data show a pronounced decrease between 24 cm and 32 cm profile  
18 depth (Fig. S.1a and Fig. 2, Table S.1), which is considered to reflect a  
19 sedimentological feature that marks the transition of the LIA towards modern  
20 conditions (= transition period). This shift can be found in several cores from the  
21 region and has been dated to start ~1820 AD, with an uncertainty of 10-15 years  
22 (Gutiérrez et al., 2009; Salvattecí et al., in review). The highest values of bSi that can  
23 be found in ~25 cm profile depth in core M771-470 are recorded in several cores off  
24 Peru and Chile just after the LIA during the transition period (Gutiérrez et al., 2009;  
25 Díaz-Ochoa et al., 2011; Salvattecí et al. in review), suggesting a regional event.  
26 Using average sedimentation rates from the nearby core B0405-13 (12°S, 184 m  
27 water depth) of ~1.8 mm/yr for the modern sediments from the time period 1870-1952  
28 AD, ~1.5 mm/yr for the transition period between 1818-1870 AD and lower  
29 sedimentation rates of 0.6 mm/yr during the LIA from ca. 1300-1818 AD (Gutiérrez  
30 et al., 2009) would indicate, that the core depth between 26 cm and 32 cm  
31 corresponds to the transition period, shallower depths reflect modern sediments and  
32 deeper depths reflect sediments from the LIA. This was adopted for the discussion in  
33 the manuscript.

1

## 2 **2 Leachate neodymium isotope composition**

### 3 **2.1 Methods**

4 To obtain the radiogenic isotope composition of past bottom seawater at the sites of  
5 the sediment cores from the early diagenetic Fe-Mn coatings of the sediment particles,  
6 previously published methods were applied (Gutjahr et al., 2007; Stumpf et al., 2010).  
7 First, the carbonate fraction was removed from the freeze-dried and homogenized  
8 sediment samples using a 15%-acetic acid/1 M Na-acetate buffer solution.  
9 Afterwards, the authigenic Fe-Mn oxyhydroxide fraction was leached and separated  
10 from the sediment with a 0.05 M hydroxylamine hydrochloride/15%-acetic acid  
11 solution buffered with NaOH to pH 3.8. For purification of the leachate fraction and  
12 analyses of Nd and Sr isotope composition please refer to the main text.

13

### 14 **2.2 Changes in Subsurface Water Masses**

15 The  $\epsilon_{\text{Nd coating}}$  record of core M771-470 only shows a small variability ranging from -  
16 1.2 to -2.3 with a mean value of  $-1.7 \pm 0.7$  ( $2\sigma_{(\text{sd})}$ ) and no significant trends are  
17 observable (Fig. S2, Table S2). For core B0405-6 no  $\epsilon_{\text{Nd coating}}$  signature could be  
18 determined because the available amount of left over sediment material was not  
19 sufficient.

20 Knowledge about changes in the origin of the subsurface waters would help to better  
21 constrain some of the changes in utilisation discussed, i.e. concerning the source  
22 regions (northern or southern) of the water masses and therefore which pre-formed  
23 (utilisation) signal should be assumed. Early diagenetic Fe-Mn coatings in marine  
24 sediments have been shown to archive the dissolved  $\epsilon_{\text{Nd}}$  signature of (bottom) water  
25 masses, which had been acquired in the source regions of water masses via  
26 weathering of continental rocks with distinct isotopic signatures and supply to the  
27 ocean via rivers, eolian input or through shelf exchange processes (Frank, 2002;  
28 Lacan and Jeandel, 2005). The Eastern Equatorial Pacific is influenced by two main  
29 water mass sources. The Central Pacific is characterised by more radiogenic  
30 signatures around -2 and waters of this origin are supplied to the EEP via the  
31 EUC/PCUC (Fig. 1) (Lacan and Jeandel, 2001; Grasse et al., 2012). In contrast, the  
32 water masses of Southern Ocean origin are characterised by less radiogenic signatures

1 around -8 (Piepgras and Jacobsen, 1988; Grasse et al., 2012). Core M771-470 is  
2 located in 145 m water depth, which is in the present day core depth of the PCUC  
3 (Fig. 1) (Brink et al., 1983). The  $\epsilon_{\text{Nd coating}}$  signature in core M771-470 ranges between  
4 -1.2 and -2.3, which suggests that the signature has not deviated significantly from the  
5 composition of the present-day PCUC (Grasse et al., 2012; Ehlert et al., 2013). As  
6 described above, the PCUC is the predominant bottom current at the location of the  
7 core under strong upwelling conditions. When upwelling was weak the surface  
8 currents could expand both latitudinally and vertically within the water column and  
9 may also have impacted the bottom water signatures (Montes et al., 2011). However,  
10 as described by Ehlert et al. (2013), the variability of the  $\epsilon_{\text{Nd coating}}$  signature on the  
11 Peruvian shelf has not necessarily only been related to the prevalent current regime  
12 and water mass mixing but exchange between bottom waters and the underlying  
13 sediments and the pore waters plays an important role, in particular under oxygen-  
14 depleted conditions in the sediments and bottom waters (Haley et al., 2004; Lacan and  
15 Jeandel, 2005), which prevents a reliable assessment of past water mass mixing based  
16 on the Nd isotope composition of the coatings. This is the reason why the data for the  
17 one core are not included in the discussion of the main text and only provided here for  
18 completeness.

19

## 20 **Supplementary references**

21 Brink, K. H., Halpern, D., Huyer, A., and Smith, R. L.: The Physical Environment of  
22 the Peruvian Upwelling System, *Progress in Oceanography*, 12, 285–305, 1983.

23 Díaz-Ochoa, J. A., Pantoja, S., De Lange, G. J., Lange, C. B., Sánchez, G. E., Acuña,  
24 V. R., Muñoz, P., and Vargas, G.: Oxygenation variability in Mejillones Bay, off  
25 northern Chile, during the last two centuries, *Biogeosciences*, 8(1), 137–146, 2011.  
26 doi:10.5194/bg-8-137-2011

27 Ehlert, C., Grasse, P., and Frank, M.: Changes in silicate utilisation and upwelling  
28 intensity off Peru since the Last Glacial Maximum - insights from silicon and  
29 neodymium isotopes, *Quaternary Science Reviews*, 72, 18–35, 2013.  
30 doi:10.1016/j.quascirev.2013.04.013

- 1 Frank, M.: Radiogenic isotopes: tracers of past ocean circulation and erosional input,  
2 *Reviews of Geophysics*, 40(1), 2002. doi:10.1029/2000RG000094
- 3 Grasse, P., Stichel, T., Stumpf, R., Stramma, L., and Frank, M.: The distribution of  
4 neodymium isotopes and concentrations in the Eastern Equatorial Pacific: Water mass  
5 advection versus particle exchange, *Earth and Planetary Science Letters*, 353-354,  
6 198–207, 2012. doi:10.1016/j.epsl.2012.07.044
- 7 Gutiérrez, D., Sifeddine, A., Field, D. B., Ortlieb, L., Vargas, G., Chavez, F. P.,  
8 Velazco, F., Ferreira-Bartrina, V., Tapia, P. M., Salvattecí, R., Boucher, H., Morales,  
9 M. C., Valdés, J., Reyss, J.-L., Campusano, A., Boussafir, M., Mandeng-Yogo, M.,  
10 García, M., and Baumgartner, T.: Rapid reorganization in ocean biogeochemistry off  
11 Peru towards the end of the Little Ice Age, *Biogeosciences*, 6, 835–848, 2009.
- 12 Gutjahr, M., Frank, M., Stirling, C. H., Klemm, V., Van de Flierdt, T., and Halliday,  
13 A. N.: Reliable extraction of a deepwater trace metal isotope signal from Fe–Mn  
14 oxyhydroxide coatings of marine sediments, *Chemical Geology*, 242, 351–370, 2007.  
15 doi:10.1016/j.chemgeo.2007.03.021
- 16 Haley, B. A., Klinkhammer, G. P., and McManus, J.: Rare earth elements in pore  
17 waters of marine sediments, *Geochimica et Cosmochimica Acta*, 68(6), 1265–1279,  
18 2004. doi:10.1016/j.gca.2003.09.012
- 19 Lacan, F., and Jeandel, C.: Tracing Papua New Guinea imprint on the central  
20 Equatorial Pacific Ocean using neodymium isotopic compositions and Rare Earth  
21 Element patterns, *Earth and Planetary Science Letters*, 186, 497–512, 2001.
- 22 Lacan, F., and Jeandel, C.: Neodymium isotopes as a new tool for quantifying  
23 exchange fluxes at the continent – ocean interface, *Earth and Planetary Science  
24 Letters*, 232, 245–257, 2005. doi:10.1016/j.epsl.2005.01.004
- 25 Meysman, F. J. R., Boudreau, B. P., and Middelburg, J. J.: Modeling reactive  
26 transport in sediments subject to bioturbation and compaction, *Geochimica et  
27 Cosmochimica Acta*, 69(14), 3601–3617, 2005. doi:10.1016/j.gca.2005.01.004

- 1 Montes, I., Schneider, W., Colas, F., Blanke, B., and Echevin, V.: Subsurface  
2 connections in the eastern tropical Pacific during La Niña 1999 – 2001 and El Niño  
3 2002 – 2003, *Journal of Geophysical Research*, 116(C12022), 2011.  
4 doi:10.1029/2011JC007624
- 5 Piepgras, D. J., and Wasserburg, G. J.: Isotopic Composition of Neodymium in  
6 Waters from the Drake Passage, *Science*, 217, 207–214, 1982.
- 7 Rein, B., Lückge, A., and Sirocko, F.: A major Holocene ENSO anomaly during the  
8 Medieval period, *Geophysical Research Letters*, 31(L17211), 2004.  
9 doi:10.1029/2004GL020161
- 10 Salvattecchi, R., Field, D. B., Sifeddine, A., Ortlieb, L., Ferreira-Bartrina, V.,  
11 Baumgartner, T., Caquineau, S., Velazco, F., Reyss, J.-L., Sanchez-Cabeza, J. A., and  
12 Gutiérrez, D.: Cross-stratigraphies from a seismically active mud lens off Peru  
13 indicate horizontal extensions of laminae, missing sequences, and a need for multiple  
14 cores for high resolution records, *Marine Geology* (in review).
- 15 Stumpf, R., Frank, M., Schönfeld, J., and Haley, B. A.: Late Quaternary variability of  
16 Mediterranean Outflow Water from radiogenic Nd and Pb isotopes, *Quaternary  
17 Science Reviews*, 49, 1–11, 2010. doi:10.1016/j.quascirev.2010.06.021

18

1 Table S1. Core M771-470 a) excess  $^{210}\text{Pb}$  measurements and porosity data, b) age  
 2 model based on sedimentation rates from Gutiérrez et al. (2009), and  $^{143}\text{Nd}/^{144}\text{Nd}$ ,  $\epsilon_{\text{Nd}}$   
 3 and  $^{87}\text{Sr}/^{86}\text{Sr}$  of authigenic Fe-Mn coatings.  $2\sigma_{(\text{sd})}$  represents the external  
 4 reproducibilities of repeated standard measurements.

| a) $^{210}\text{Pb}$ -dating and porosity |                           |               |          | b) age model |            |         |                                   |                        |                         |                                 |                         |
|-------------------------------------------|---------------------------|---------------|----------|--------------|------------|---------|-----------------------------------|------------------------|-------------------------|---------------------------------|-------------------------|
| depth (cm)                                | $^{210}\text{Pb}$ (Bq/kg) | error (Bq/kg) | porosity | depth (cm)   | Sed. rate* | year AD | $^{143}\text{Nd}/^{144}\text{Nd}$ | $\epsilon_{\text{Nd}}$ | $2\sigma_{(\text{sd})}$ | $^{87}\text{Sr}/^{86}\text{Sr}$ | $2\sigma_{(\text{sd})}$ |
| 0 - 1                                     | -                         | -             | 0.953    |              |            |         |                                   |                        |                         |                                 |                         |
| 1 - 2                                     | 1.14E+03                  | 7.34E+01      | 0.944    | 1.5          |            | 1976    | 0.512539                          | -1.9                   | 0.3                     | 0.709030                        | 2.6E-05                 |
| 2 - 3                                     | -                         | -             | 0.945    | 3.5          |            | 1965    | 0.512551                          | -1.7                   | 0.3                     | 0.708971                        | 2.6E-05                 |
| 3 - 4                                     | 9.42E+02                  | 5.97E+01      | 0.940    | 5.5          |            | 1954    | 0.512546                          | -1.8                   | 0.3                     | 0.709080                        | 2.6E-05                 |
| 4 - 5                                     | -                         | -             | 0.932    | 9            | 1.8 mm/yr  | 1934    | 0.512556                          | -1.6                   | 0.3                     | 0.709099                        | 2.6E-05                 |
| 5 - 6                                     | -                         | -             | 0.938    | 11           |            | 1923    | 0.512526                          | -2.2                   | 0.3                     | 0.709121                        | 2.6E-05                 |
| 6 - 8                                     | 9.84E+02                  | 6.36E+01      | 0.955    | 15           |            | 1901    | 0.512521                          | -2.3                   | 0.3                     | 0.709112                        | 2.6E-05                 |
| 8 - 10                                    | 7.75E+02                  | 5.35E+01      | 0.935    | 19           |            | 1879    | 0.512559                          | -1.5                   | 0.3                     | 0.709094                        | 2.6E-05                 |
| 10 - 12                                   | 5.28E+02                  | 3.74E+01      | 0.928    | 20           |            | 1873    | 0.512571                          | -1.3                   | 0.3                     | 0.708748                        | 8.0E-06                 |
| 12 - 14                                   | 2.66E+02                  | 2.57E+01      | 0.925    | 23           |            | 1853    | 0.512547                          | -1.8                   | 0.3                     | 0.709153                        | 2.6E-05                 |
| 16 - 18                                   | 8.68E+01                  | 1.86E+01      | 0.920    | 25           | 1.5 mm/yr  | 1840    | 0.512539                          | -1.9                   | 0.3                     | 0.709132                        | 2.6E-05                 |
| 20 - 22                                   | 1.27E+02                  | 1.97E+01      | 0.915    | 26           |            | 1833    | -                                 | -                      | -                       | 0.708973                        | 8.0E-06                 |
| 22 - 24                                   | 9.49E+01                  | 1.87E+01      | 0.920    | 27           |            | 1827    | 0.512542                          | -1.9                   | 0.3                     | 0.709130                        | 2.6E-05                 |
| 26 - 28                                   | <2.28E+01                 | -             | 0.838    | 29           |            | 1803    | 0.512538                          | -2                     | 0.3                     | 0.709136                        | 2.6E-05                 |
| 28 - 30                                   | <2.08E+01                 | -             | -        | 32           |            | 1753    | 0.512523                          | -2.3                   | 0.3                     | 0.709140                        | 2.6E-05                 |
| 30 - 34                                   | <1.89E+01                 | -             | 0.818    | 32 (dupl.)   |            | 1753    | 0.512564                          | -1.4                   | 0.3                     | 0.708935                        | 5.0E-06                 |
| 34 - 38                                   | <2.22E+01                 | -             | 0.846    | 36           | 0.6 mm/yr  | 1687    | 0.512574                          | -1.2                   | 0.3                     | 0.708727                        | 8.0E-06                 |
| 40                                        | -                         | -             | 0.822    | 40           |            | 1620    | 0.512565                          | -1.4                   | 0.3                     | 0.708928                        | 8.0E-06                 |
| 44                                        | -                         | -             | 0.841    | 44           |            | 1553    | 0.512572                          | -1.3                   | 0.3                     | 0.708745                        | 5.0E-06                 |
| 48.5                                      | -                         | -             | 0.839    | 48.5         |            | 1478    | 0.512564                          | -1.4                   | 0.3                     | 0.708847                        | 5.0E-06                 |

5 \*average sedimentation rates were determined on nearby core B0405-13.

6

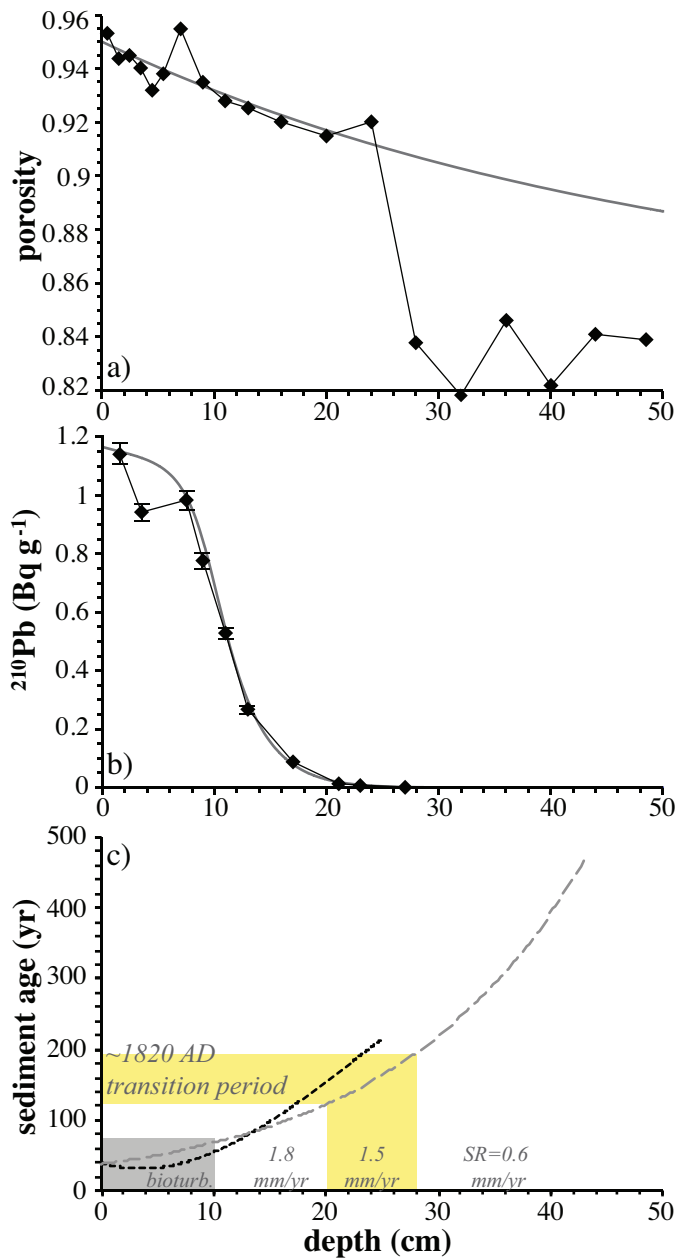

1

2 Figure S1. Age model for core M771-470 (data: black diamonds, best fit: grey line).  
 3 a) porosity versus depth (cm), b) excess  $^{210}\text{Pb}$  activity ( $\text{Bq g}^{-1}$ ), and c) resulting  
 4 age/depth relationship (black curve =  $^{210}\text{Pb}$  modeling, grey curve = using average  
 5 sedimentation rates of core B0405-13 (Gutiérrez et al., 2009). The grey shading  
 6 indicates the bioturbated zone, the yellow shading highlights the transition zone from  
 7 the LIA to modern sediments.

8



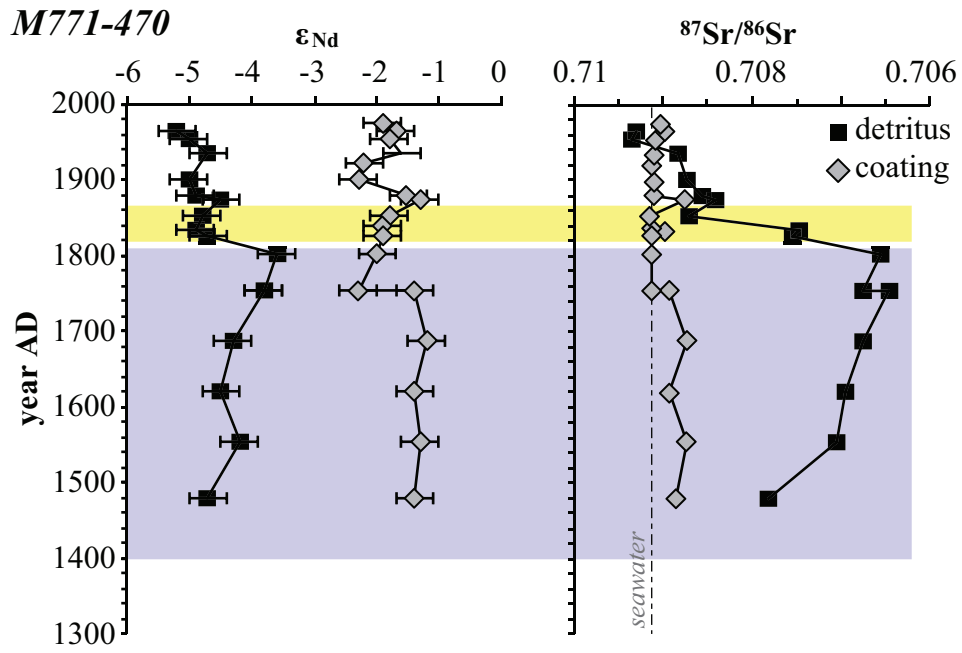

1

2 Figure S2. Downcore records for core M771-470 for  $\epsilon_{Nd}$  and  $^{87}Sr/^{86}Sr$  for authigenic  
 3 Fe-Mn coatings (grey diamonds) and detrital material (black squares). Error bars  
 4 represent  $2\sigma_{(sd)}$  external reproducibilities of repeated standard measurements. The  
 5 grey dashed line indicates the present day dissolved seawater  $^{87}Sr/^{86}Sr$  of 0.70916.  
 6 The blue shading indicates the LIA and the yellow shading represents the time span of  
 7 the transition period.
